# Supplementary material for: Wide-bandgap perovskites for multijunction solar cells: improvement of crystalline quality of Cs0.1FA0.9PbI1.4Br1.6 by using lead thiocyanate
Source: Royal Society of Chemistry journal article supplement (doi:10.1039/d3ta01211e), 2023-01-01
Supplement: d3ta01211e1.pdf [file d3ta01211e1.pdf]

## Supporting Information for

### **Wide-bandgap perovskites for multijunction solar cells: improvement of crystalline quality of $\text{Cs}_{0.1}\text{FA}_{0.9}\text{PbI}_{1.4}\text{Br}_{1.6}$ by using lead thiocyanate**

Thuy Thi Nguyen<sup>1,3+</sup>, Jihyun Kim<sup>2+</sup>, Yeon Soo Kim<sup>1</sup>, Bich Phuong Nguyen<sup>1</sup> and William Jo<sup>1,2\*</sup>

<sup>1</sup>New and Renewable Energy Research Center, Ewha Womans University, Seoul, 03760, Korea

<sup>2</sup>Department of Physics, Ewha Womans University, Seoul 03760, Korea

<sup>3</sup>Institute of Materials Science, Vietnam Academy of Science and Technology, Hanoi 100000,  
Vietnam

E-mail: [wmjo@ewha.ac.kr](mailto:wmjo@ewha.ac.kr)

\*Corresponding author

+These authors equally contributed to this work.

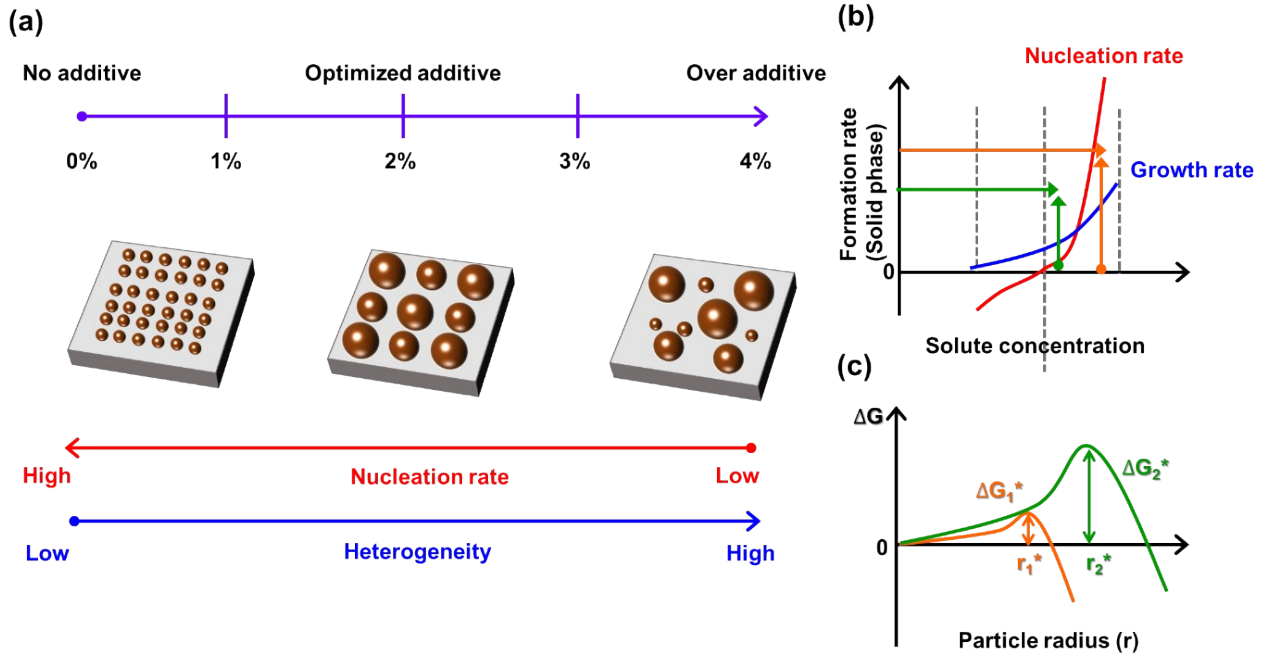

**Figure S1.** (a) Schematic diagram of perovskite grain growth during annealing by  $\text{Pb}(\text{SCN})_2$  concentrations. (b) Relations between the nucleation and growth rate and the concentration of growth species. (c) Comparison of critical radius and free energy difference.

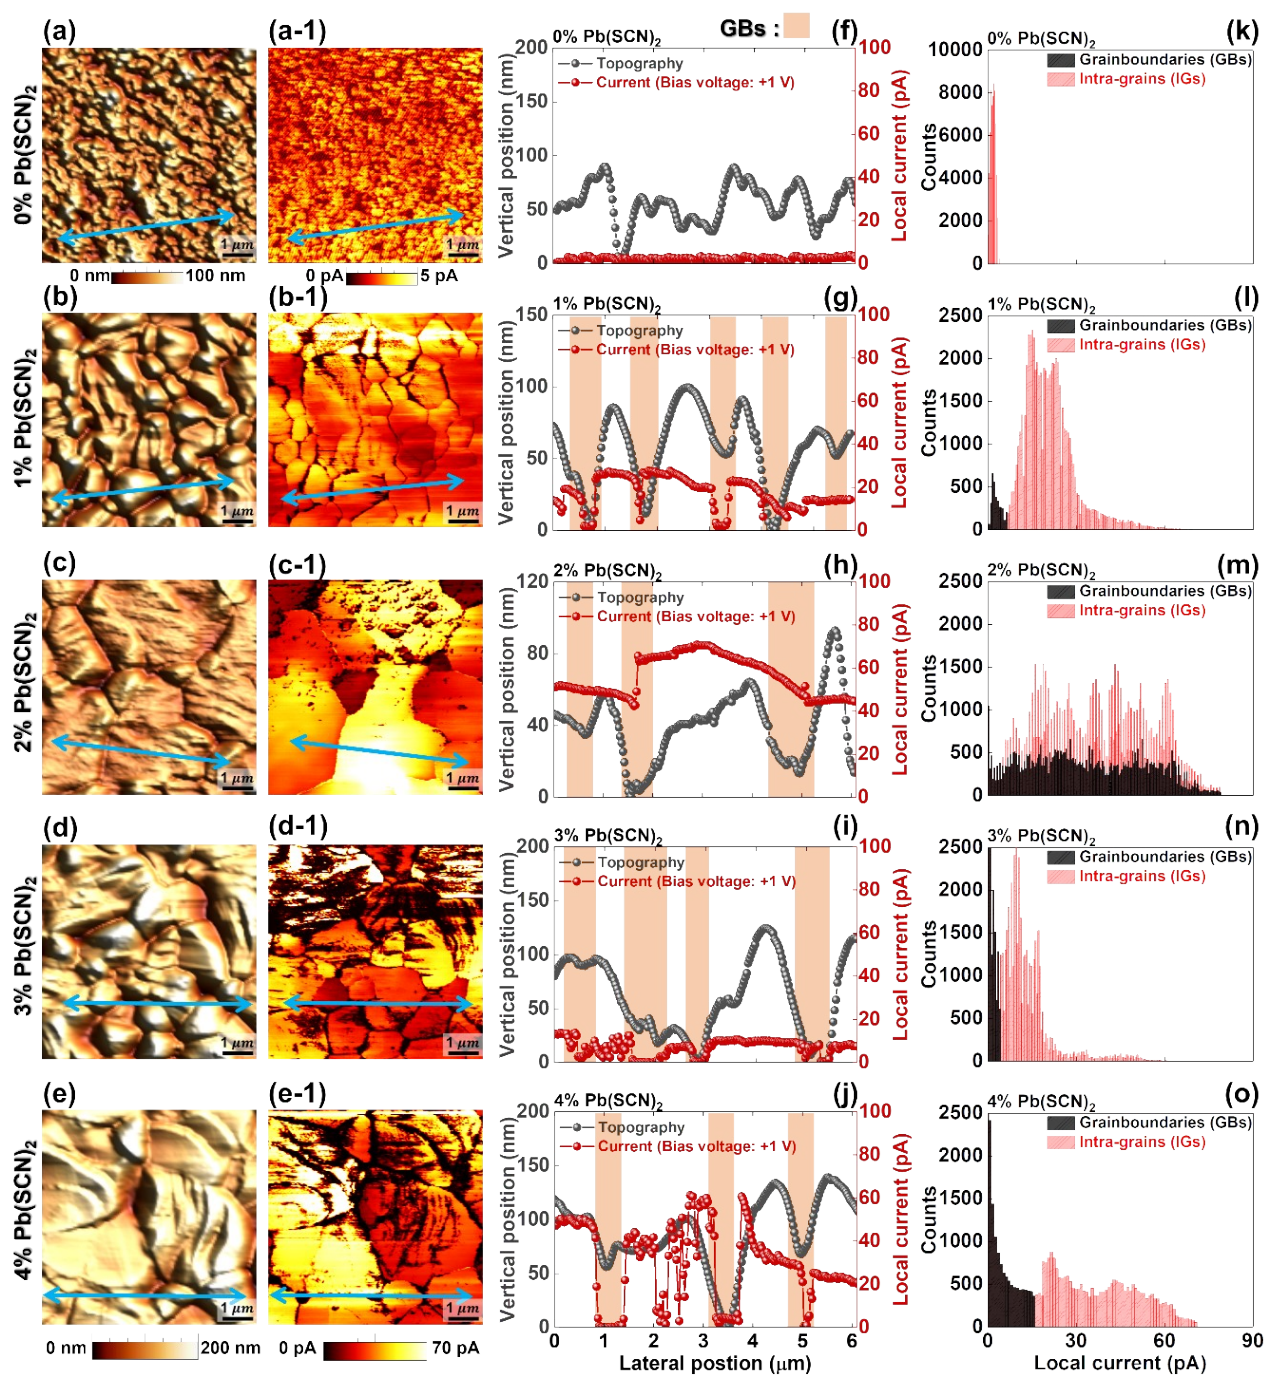

**Figure S2.** (a-e) Surface topography images, (a-1-e-1) local current maps, (f-j) line profiles, and (k-o) statistical characterization of the local current by c-AFM for the GBs and IGs in the  $\text{Pb}(\text{SCN})_2$ -added perovskite thin films.

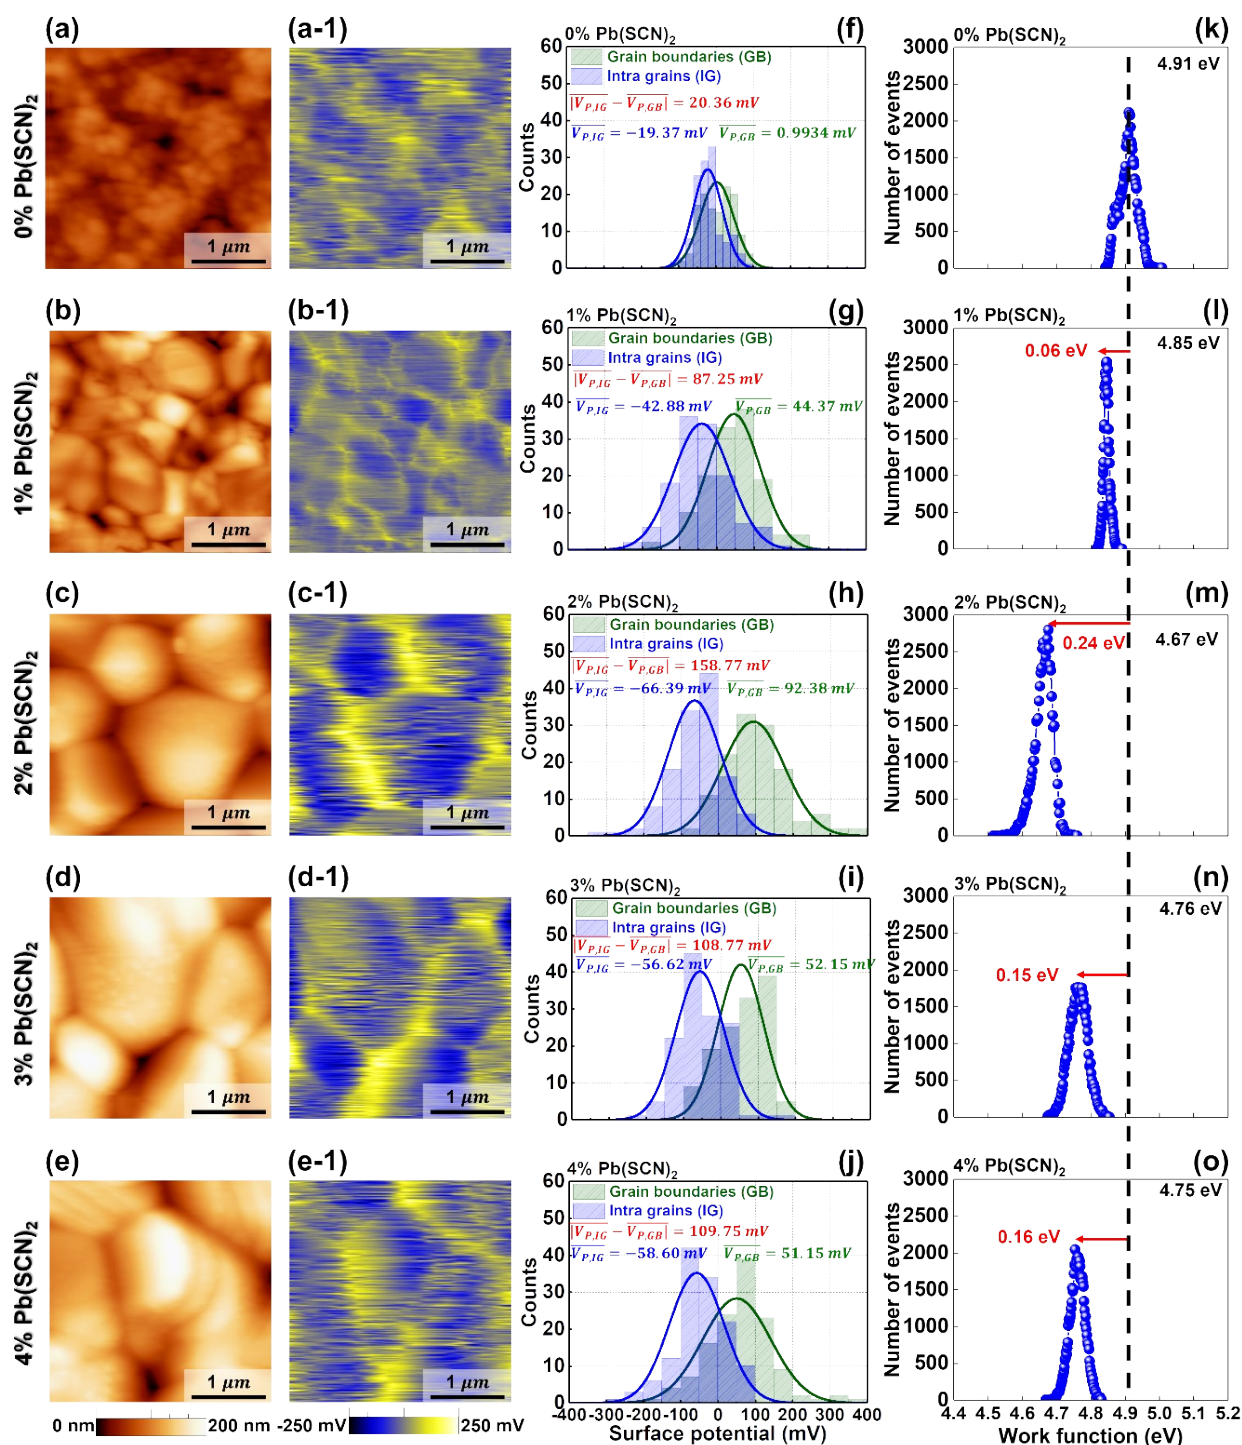

**Figure S3.** KPFM results of the  $\text{Cs}_{0.1}\text{FA}_{0.9}\text{PbI}_{1.4}\text{Br}_{1.6}$  thin films: (a-e) topography, (a-1-e-1) surface potential maps, (f-j) statistical characterization, and (k-o) work function determined from the surface potential maps.
